# Supplementary material for: Host chitinase 3-like-1 is a universal therapeutic target for SARS-CoV-2 viral variants in COVID-19
Source: PubMed Central journal article supplement (PMC9273216; doi:10.7554/elife.78273), 2022-06-23

**Fig.6. Immunocytochemical evaluation of delta pseudovirus infection of Calu-3 cells.** Box in each panel indicates the selected representative area used in figure 6.

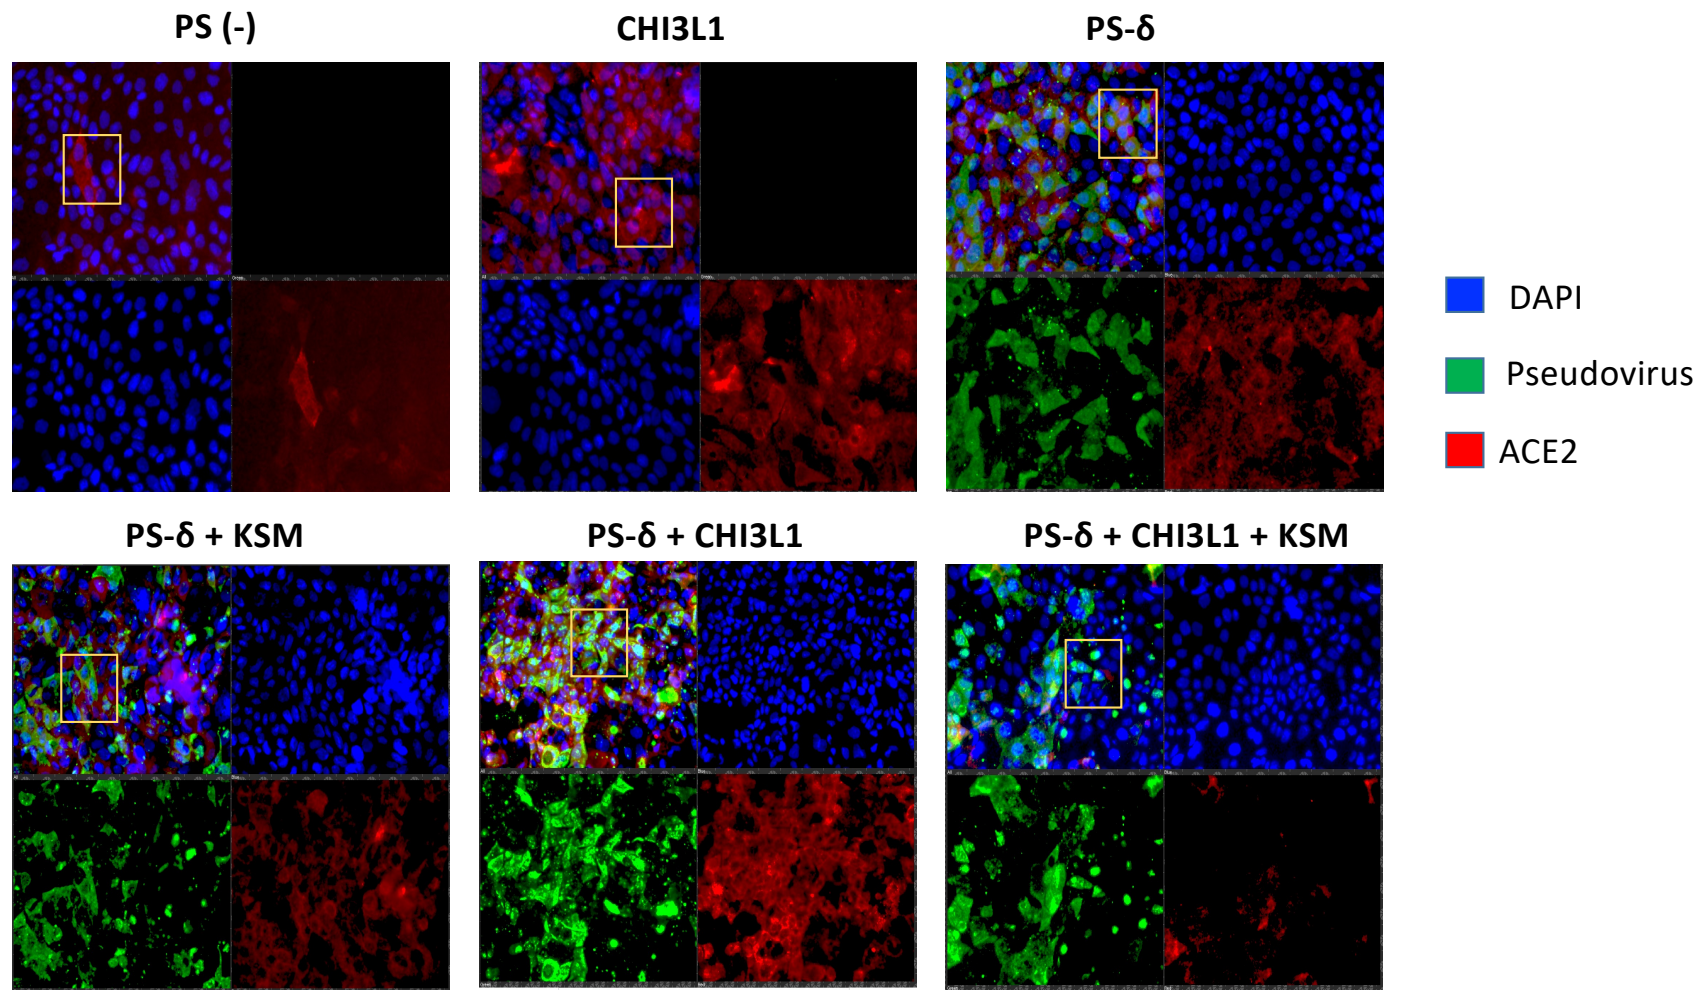

Supplement: elife-78273-fig6-data1.pdf [file elife-78273-fig6-data1.pdf]
