# Supplementary material for: Host chitinase 3-like-1 is a universal therapeutic target for SARS-CoV-2 viral variants in COVID-19
Source: eLife journal article supplement (doi:10.7554/elife.78273), 2022-06-23
Supplement: supp [file elife_poa_e78273_Figure_4_source_data_1.pdf › elife_poa_e78273_Figure_4_source_data_1.pdf]

Figure 4A

|                 |   |   |   |   |
|-----------------|---|---|---|---|
| Chi3l1 (250 ng) | - | + | - | + |
| Ksm (250 ng)    | - | - | + | + |

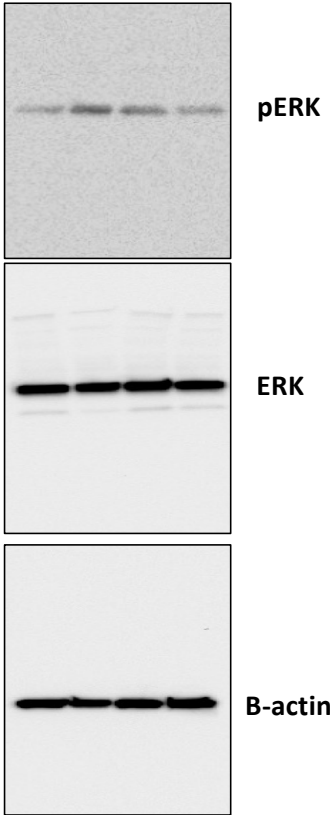

Figure 4B

|                 |   |   |   |   |
|-----------------|---|---|---|---|
| Chi3l1 (250 ng) | - | + | - | + |
| Ksm (250 ng)    | - | - | + | + |

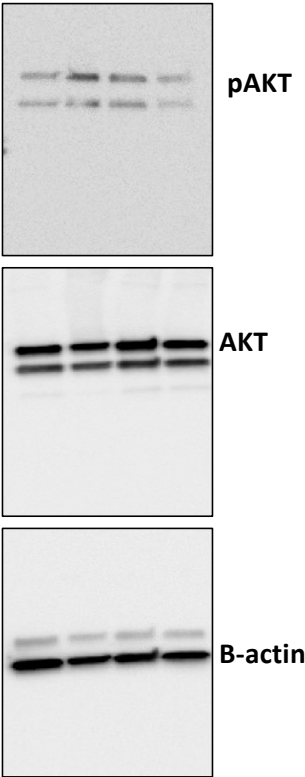

Densitometry data

|         |            |            |            |            |
|---------|------------|------------|------------|------------|
| TErk    | 20,831,109 | 26,395,746 | 26,838,669 | 22,284,795 |
| TAKT    | 38,741,934 | 41,730,528 | 50,292,858 | 37,472,904 |
| PERK    | 335,790    | 745,836    | 494,936    | 366,964    |
| BACTIN  | 27,213,459 | 21,010,665 |            |            |
| PAKT    | 208,736    | 836,480    | 551,328    | 303,968    |
| B-ACTIN | 26,608,647 | 28,609,347 | 3,676,140  | 9,860,838  |
